# Supplementary material for: The Arabidopsis thaliana Poly(ADP-Ribose) Polymerases 1 and 2 Modify DNA by ADP-Ribosylating Terminal Phosphate Residues
Source: PubMed Central journal article supplement (PMC7726343; doi:10.3389/fcell.2020.606596), 2020-11-26
Supplement: Data_Sheet_1.pdf [file Data_Sheet_1.pdf]

## SUPPLEMENTARY MATERIAL

### **The *Arabidopsis thaliana* poly(ADP-ribose) polymerases 1 and 2 modify DNA by ADP-ribosylating terminal phosphate residues**

**Sabira TAIPAKOVA<sup>1</sup>, Aigerim KUANBAY<sup>1,2</sup>, Christine Saint-Pierre<sup>3</sup>, Didier Gasparutto<sup>3</sup>, Yeldar BAIKEN<sup>4,5</sup>, Regina GROISMAN<sup>2</sup>, Alexander A. ISHCENKO<sup>2,\*</sup>, Murat SAPARBAEV<sup>1,2,\*</sup> and Amangeldy K. BISSENBAEV<sup>1,\*</sup>**

<sup>1</sup> Department of Molecular Biology and Genetics, Faculty of Biology and Biotechnology, al-Farabi Kazakh National University, 0530040, Almaty, Kazakhstan.

<sup>2</sup> Groupe «Mechanisms of DNA Repair and Carcinogenesis», Equipe Labellisée LIGUE 2016, CNRS UMR9019, Université Paris-Saclay, Gustave Roussy Cancer Campus, F-94805 Villejuif Cedex, France.

<sup>3</sup> Université Grenoble Alpes, CEA, CNRS, IRIG / SyMMES-UMR5819 / CREAB, F-38000 Grenoble, France.

<sup>4</sup> National Laboratory Astana, Nazarbayev University, Nur-Sultan, Kabanbay Batyr ave 53, 010000, Kazakhstan.

<sup>5</sup> School of Engineering and Digital Sciences, Nazarbayev University, Nur-Sultan, Kabanbay Batyr ave 53, 010000, Kazakhstan.

**Supplementary Material Table S1.** Sequences of the oligonucleotides and their duplexes used in this study<sup>a</sup>.

| Name | Oligonucleotides sequences and structures                                                                                                                                                                                                 |
|------|-------------------------------------------------------------------------------------------------------------------------------------------------------------------------------------------------------------------------------------------|
| S1   | $\begin{array}{c} \text{3'2P-} \\ \text{CACCGCGCCTCTGAATCTCTTTAAACCGCGCCCCTTAAGG } 5' \\ \text{RexT} \end{array}$                                                                                                                         |
| S2   | $\begin{array}{c} \text{3'2P-} \\ \text{CACCGCGCCTCTGAATCTCTTTAAACCGTGCCCCTTAAGG } 5' \\ \text{Rex12T} \end{array}$                                                                                                                       |
| S3   | $\begin{array}{c} \text{P-} \quad \text{ExoA} \\ \text{5' GTGGCGCGGAGACTTAGAGAA} \\ \text{CACCGCGCCTCTGAATCTCTTTAAACCGCGCCCCTTAAGG } 5' \\ \text{RexT} \quad \text{-3'2P} \end{array}$                                                    |
| S4   | $\begin{array}{c} \text{P-} \quad \text{Exo20} \\ \text{5' GTGGCGCGGAGACTTAGAGA} \quad \text{dAM} \quad \text{3'2P} \\ \text{CACCGCGCCTCTGAATCTCTTTAAACCGCGCCCCTTAAGG } 5' \\ \text{RexT} \end{array}$                                    |
| S5   | $\begin{array}{c} \text{3'2P-} \quad \text{ExoA} \\ \text{5' GTGGCGCGGAGACTTAGAGAA} \\ \text{CACCGCGCCTCTGAATCTCTTTAAACCGCGCCCCTTAAGG } 5' \\ \text{RexT} \end{array}$                                                                    |
| S6   | $\begin{array}{c} \text{3'2P-} \quad \text{ExoA} \quad \text{P-} \\ \text{5' GTGGCGCGGAGACTTAGAGAA} \\ \text{CACCGCGCCTCTGAATCTCTTTAAACCGCGCCCCTTAAGG } 5' \\ \text{RexT} \end{array}$                                                    |
| S7   | $\begin{array}{c} \text{3'2P-} \quad \text{Exo15} \\ \text{5' GTGGCGCGGAGACTT} \\ \text{CACCGCGCCTCTGAATCTCTTTAAACCGTGCCCCTTAAGG } 5' \\ \text{Rex12T} \end{array}$                                                                       |
| S8   | $\begin{array}{c} \text{3'2P-} \quad \text{ExoA} \quad \text{P-} \quad \text{Exo14} \\ \text{5' GTGGCGCGGAGACTTAGAGAA} \quad \text{GCGCGGGGAATTCC} \\ \text{CACCGCGCCTCTGAATCTCTTTAAACCGCGCCCCTTAAGG } 5' \\ \text{RexT} \end{array}$     |
| S9   | $\begin{array}{c} \text{3'2P-} \quad \text{ExoA} \quad \text{P-} \quad \text{Exo17} \\ \text{5' GTGGCGCGGAGACTTAGAGAA} \quad \text{TTGGCGCGGGGAATTCC} \\ \text{CACCGCGCCTCTGAATCTCTTTAAACCGCGCCCCTTAAGG } 5' \\ \text{RexT} \end{array}$  |
| S10  | $\begin{array}{c} \text{3'2P-} \quad \text{ExoA} \quad \text{P-} \quad \text{Exo18} \\ \text{5' GTGGCGCGGAGACTTAGAGAA} \quad \text{TTTGGCGCGGGGAATTCC} \\ \text{CACCGCGCCTCTGAATCTCTTTAAACCGCGCCCCTTAAGG } 5' \\ \text{RexT} \end{array}$ |

|     |                                                                                                                                                                                                                                           |
|-----|-------------------------------------------------------------------------------------------------------------------------------------------------------------------------------------------------------------------------------------------|
| S11 | <p>32P- ExoA Exo19</p> <p>5' GTGGCGCGGAGACTTAGAGAA ATTTGGCGCGGGGAATTCC<br/>CACCGCGCCTCTGAATCTCTT-TAAACCGCGCCCCTTAAGG 5'</p> <p>RexT</p>                                                                                                   |
| S12 | <p>32P- ExoA Exo19</p> <p>5' GTGGCGCGGAGACTTAGAGAA ATTTGGCGCGGGGAATTCC<br/>CACCGCGCCTCTGAATCTCTT-TAAACCGCGCCCCTTAAGG 5'</p> <p>RexT</p>                                                                                                   |
| S13 | <p>32P- ExoA Exo19</p> <p>5' GTGGCGCGGAGACTTAGAGAA ATTTGGCGCGGGGAATTCC<br/>CACCGCGCCTCTGAATCTCTT-TAAACCGCGCCCCTTAAGG 5'</p> <p>RexT</p>                                                                                                   |
| S14 | <p>32P- Exo15 Exo3'A-12-25</p> <p>5' GTGGCGCGGAGACTT AGAGAAATTTGGCACGGGGAATTCC<br/>CACCGCGCCTCTGAA-TCTCTTTAAACCGTGCCCCTTAAGG 5'</p> <p>Rex12T</p>                                                                                         |
| S15 | <p>32P- Exo15 Exo19</p> <p>5' GTGGCGCGGAGACTT ATTTGGCGCGGGGAATTCC<br/>CGCCTCTGAATCTCTTTAAACCGCGCCCCTTAAGG 5'</p> <p>RexT-35</p>                                                                                                           |
| S16 | <p>P- ExoA Exo19</p> <p>5' GTGGCGCGGAGACTTAGAGAA ATTTGGCGCGGGGAATTCC<br/>CACCGCGCCTCTGAATCTCTT-TAAACCGTGCCCCTTAAGG 5'</p> <p>Rex12T</p>                                                                                                   |
| S17 | <p>P- Exo15 Exo3'A-12-25</p> <p>5' GTGGCGCGGAGACTT AGAGAAATTTGGCACGGGGAATTCC<br/>CACCGCGCCTCTGAA-TCTCTTTAAACCGTGCCCCTTAAGG 5'</p> <p>Rex12T</p>                                                                                           |
| S18 | <p>32P- 10-RT P- T19-RT</p> <p>5' TGA CTGCATA TGCATGTAGACGATGTGCAT<br/>ACTGACGTAT-ACGTACATCTGCTACACGTA 5'</p> <p>RT-A</p>                                                                                                                 |
| S19 | <p>32P- 7 13db P- 18</p> <p>5' <b>GTCATTC</b>GCCTGTGCCCTCAA CGAATTCACAAGCCTAGA 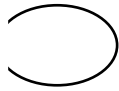 HEG linker<br/>3' CGACACGGGAGTTGGCTTAAGTGTTCGGATCT <b>ttt</b> 32</p> |
| S20 | <p>32P- 10db P- 22</p> <p>5' GCTGTGCCCT CAACCGAATTCACAAGCCTAGA  HEG linker<br/>3' CGACACGGGA-GTTGGCTTAAGTGTTCGGATCT <b>ttt</b> 32</p>                |

<sup>a</sup>The symbol “t” designates modified nucleotide containing a thiophosphate group; “HEG linker” denotes hexaethyleneglycol linker [(CH<sub>2</sub>-CH<sub>2</sub>-O)<sub>6</sub>]; “Dbait” designates a long single-stranded hairpin

oligonucleotide in which complementary parts of DNA tethered with hexaethyleneglycol linker; “P” designates a phosphate group, “<sup>32</sup>P” designates [ $\gamma$ -<sup>32</sup>P]-ATP labeled oligonucleotide termini; “dAM<sup>32</sup>P” designates [ $\alpha$ -<sup>32</sup>P]-3'-dATP (cordycepin 5'-triphosphate) labeled oligonucleotide termini; following abbreviations “ExoA”, “Exo20”, “Exo15”, “10RT”, “T19RT”, “10db”, “7-13db”, “Exo19”, “Exo18”, “Exo17”, “Exo14”, “Exo3'A-12-25”, “RexT”, “Rex12T”, “RexT-35”, “RT-A” “50-db”, “54-db” designate the single-stranded oligonucleotide fragments used to construct DNA structures. In DNA structure referred as “S19” the 7 nt 5' single-stranded overhang highlighted in red.

**Supplementary Material Figures S1-S4.**

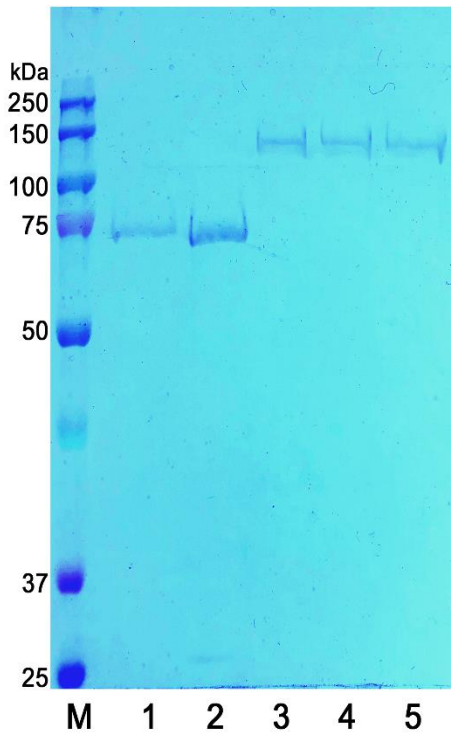

**Supplementary Figure S1.** SDS-PAGE analysis of the purified wild type and mutant Arabidopsis atPARP2 and atPARP1 proteins. Lane M, protein size markers; lane 1, 1  $\mu$ g atPARP2-WT; lane 2, 1  $\mu$ g atPARP2-E614K mutant; lane 3, 1  $\mu$ g atPARP1-WT; lane 4, 1  $\mu$ g atPARP1-E960K mutant; lane 5, 1  $\mu$ g atPARP1 E960Q mutant. For details, see Materials and Methods.

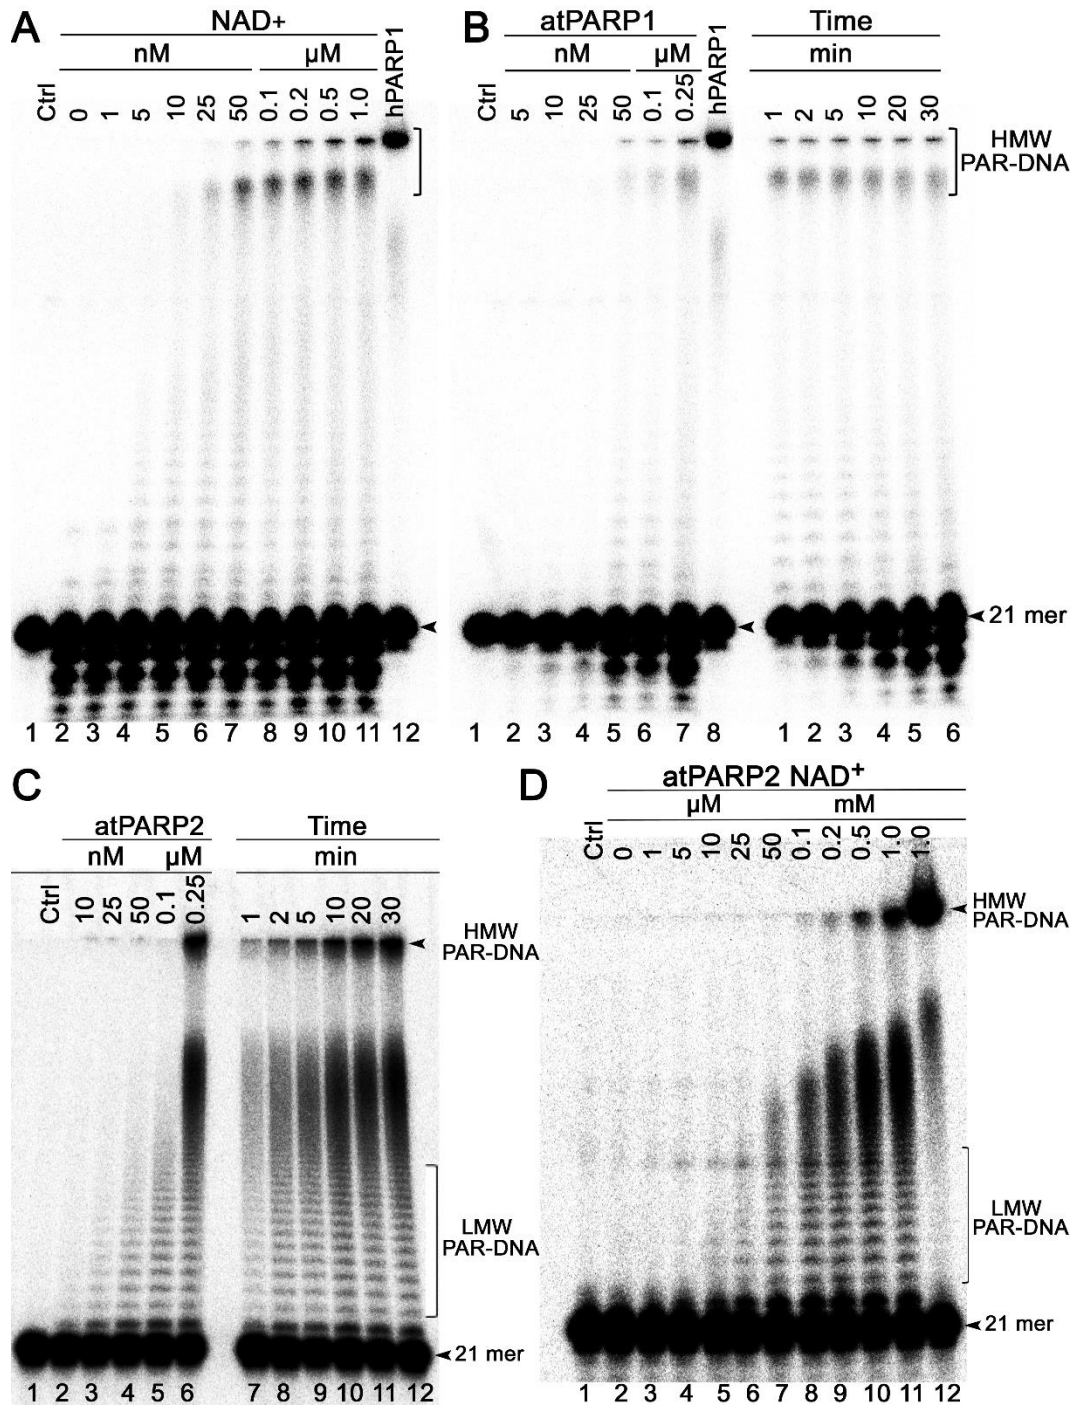

**Supplementary Figure S2.** The atPARP1- and atPARP2-catalysed DNA PARylation in the presence of varying concentrations of NAD<sup>+</sup>, protein and incubation time. **(A)** Protein concentration and time dependence of atPARP1-catalysed DNA PARylation. **(B)** NAD<sup>+</sup> concentration dependence of atPARP1-catalysed DNA PARylation. **(C)** Protein concentration and time dependence of atPARP2-catalysed DNA PARylation. **(D)** NAD<sup>+</sup> concentration dependence of atPARP2-catalysed DNA PARylation.

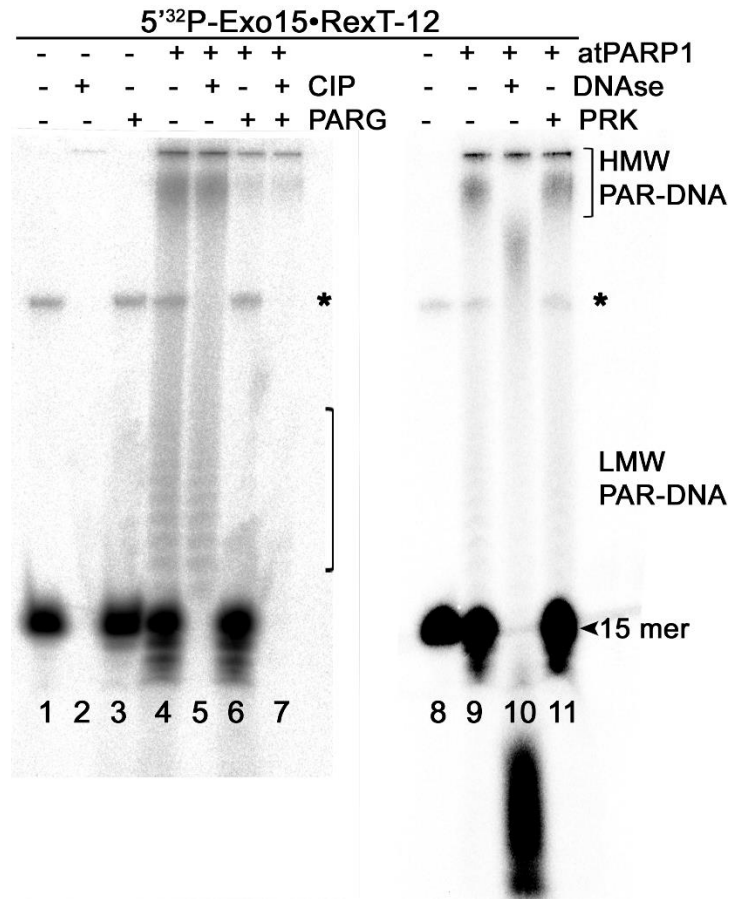

**Supplementary Figure S3.** Denaturing PAGE analysis of the products of digestion of PAR-DNA adducts by various enzymes. To generate PAR-DNA products 20 nM 5'-[<sup>32</sup>P]-labelled Exo15•Rex12T<sup>rec</sup> duplex was incubated with 250 nM atPARP1 in the presence of 1mM NAD<sup>+</sup> for 30min at 37°C. After incubation, the reaction mixtures were heated for 20 min at 80°C and then incubated either in the presence of 50 pg•μL<sup>-1</sup> PARG (in ADPR buffer) for 60 min at 37°C, or 10 U CIP (in CIP buffer) or 10.5 U DNase I (in buffer with 0.5 mM CaCl<sub>2</sub>) for 30 min at 37°C or 50 μg•mL<sup>-1</sup> proteinase K for 30 min at 50°C in the presence of 0.1% SDS. Arrows indicate HMW and LMW PAR-DNA products and free 15 mer oligonucleotide. Asterisk indicates a nonspecific ligation product produced by *E. coli* NAD<sup>+</sup>-dependent DNA ligase A. For more details, see Materials and Methods.

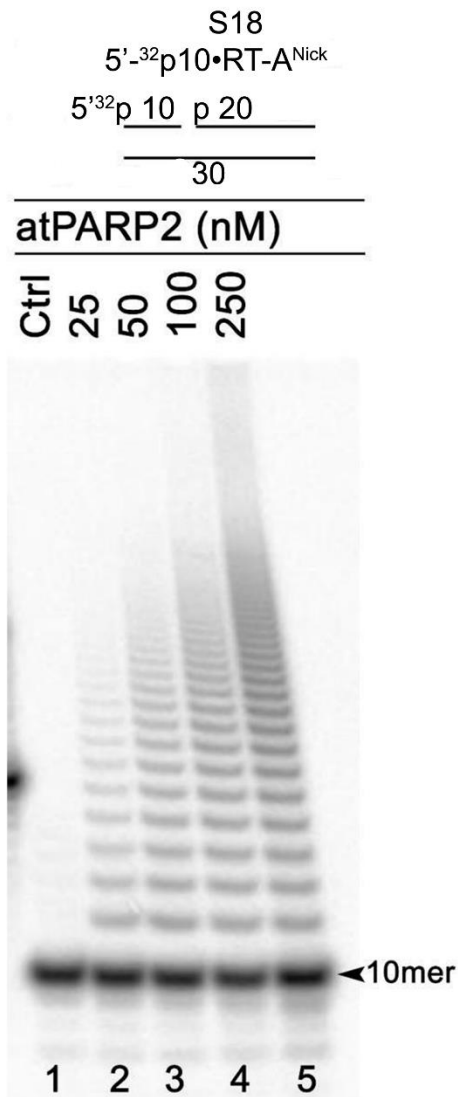

**Supplementary Figure S4.** Formation of the PAR-DNA products by atPARP2 for MALDI-TOF MS analysis. 25-250 nM atPARP2 was incubated with 20 nM 5'-[<sup>32</sup>P]-labelled p10•RT-A<sup>Nick</sup> oligonucleotide duplex (also referred as S18) in the presence of 1 mM NAD<sup>+</sup> for 30 min at 37°C. The reaction products were analyzed by denaturing PAGE. Arrow indicates free 10 mer oligonucleotide. For more details, see Materials and Methods.



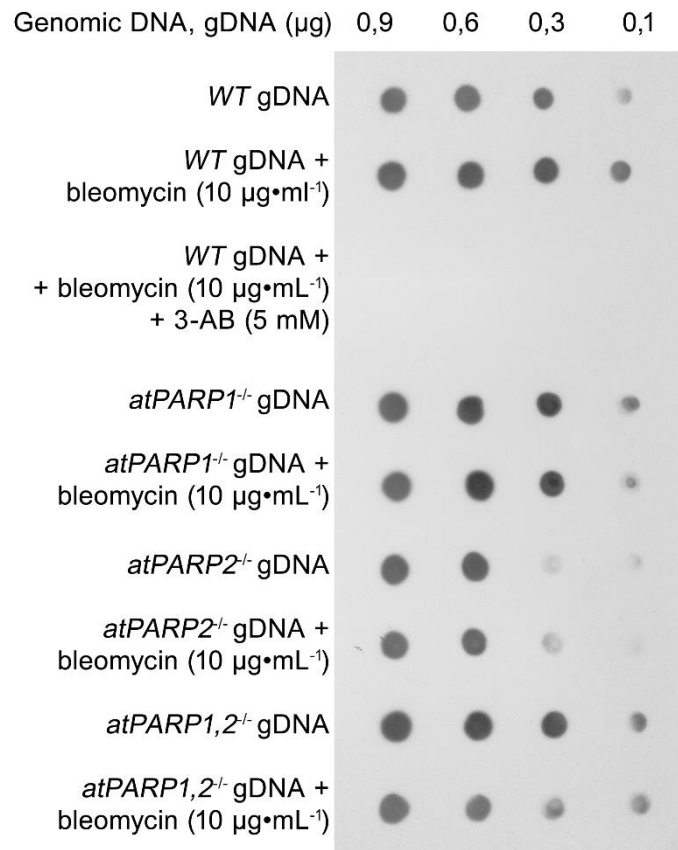

**Supplementary Figure S5.** Detection of PAR-DNA adducts in gDNA extracted from 14-days-old seedlings grown under either normal conditions or genotoxic stress. Different quantities of gDNA in TE buffer (10 mM Tris-Cl pH 8.0, 1 mM EDTA) were spotted onto a nylon membrane, followed by the pan-ADP-ribose reagent (MABE1016) dot blotting. For more details, see Materials and Methods.
